# Supplementary material
Source: MDPI journal article supplement (https://www.mdpi.com/1424-8247/12/3/109)

Figure S1

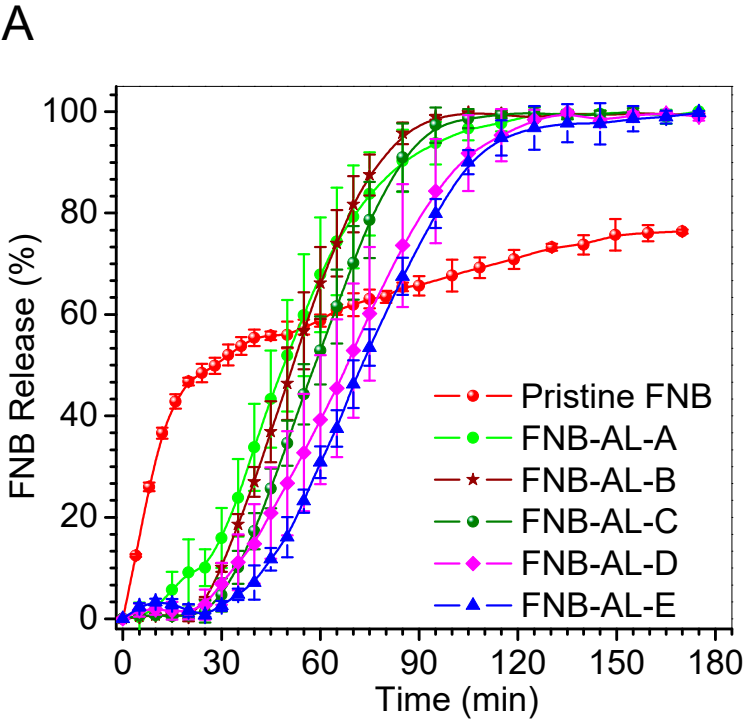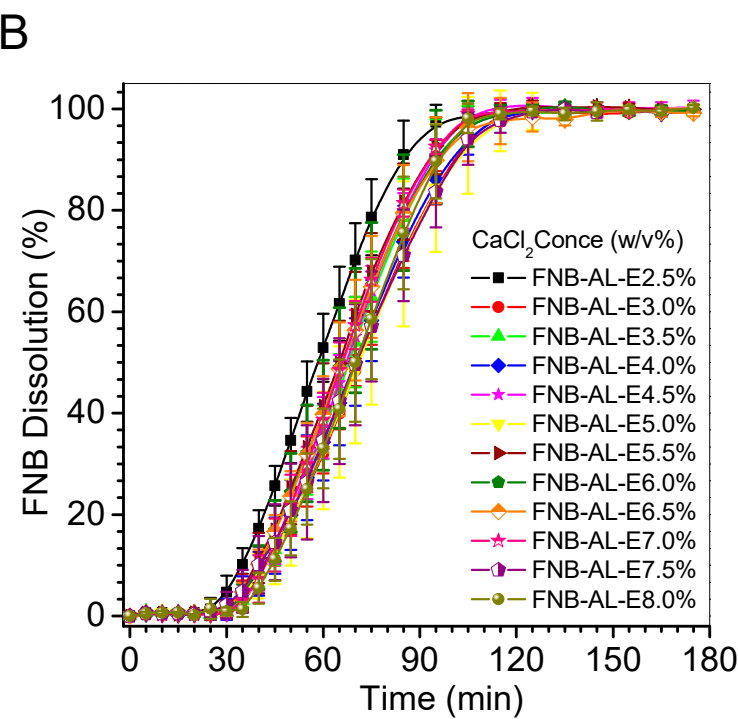

Figure S2

A

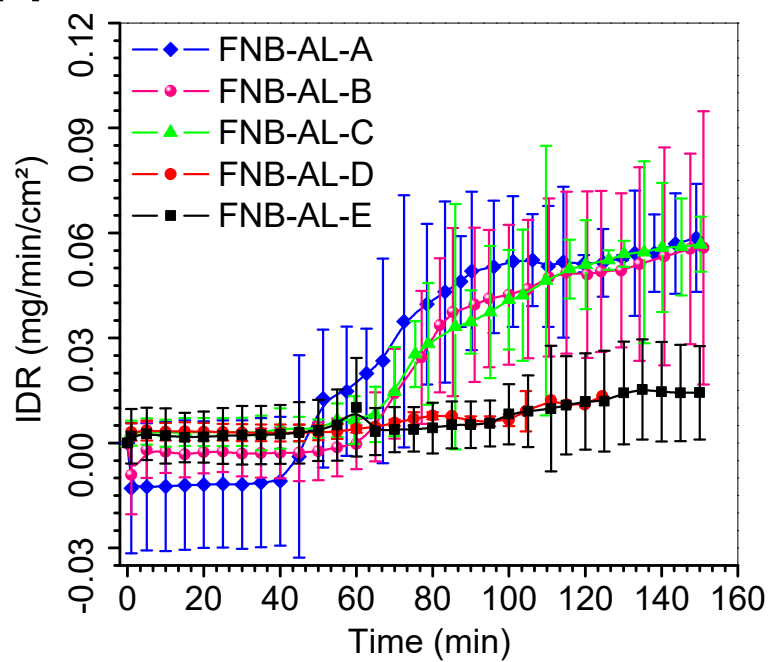

B

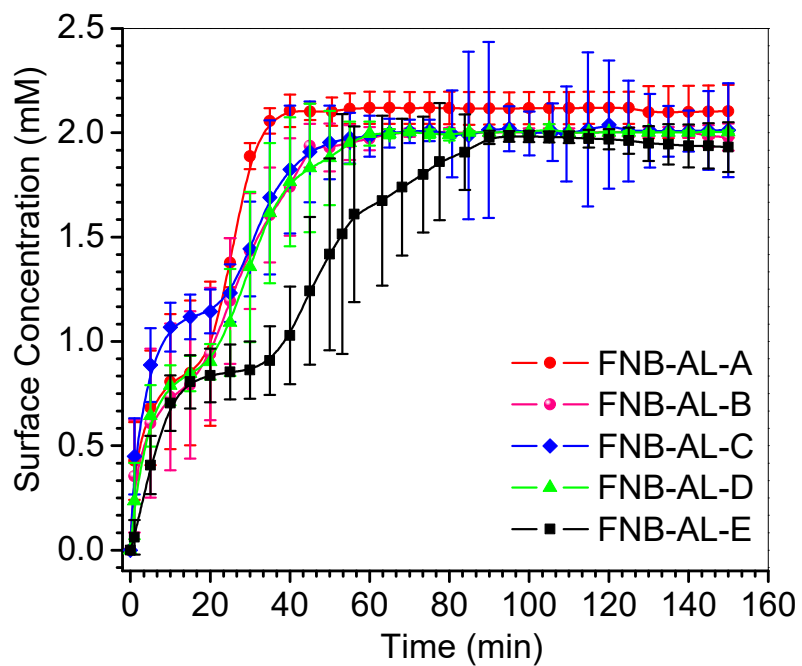

C

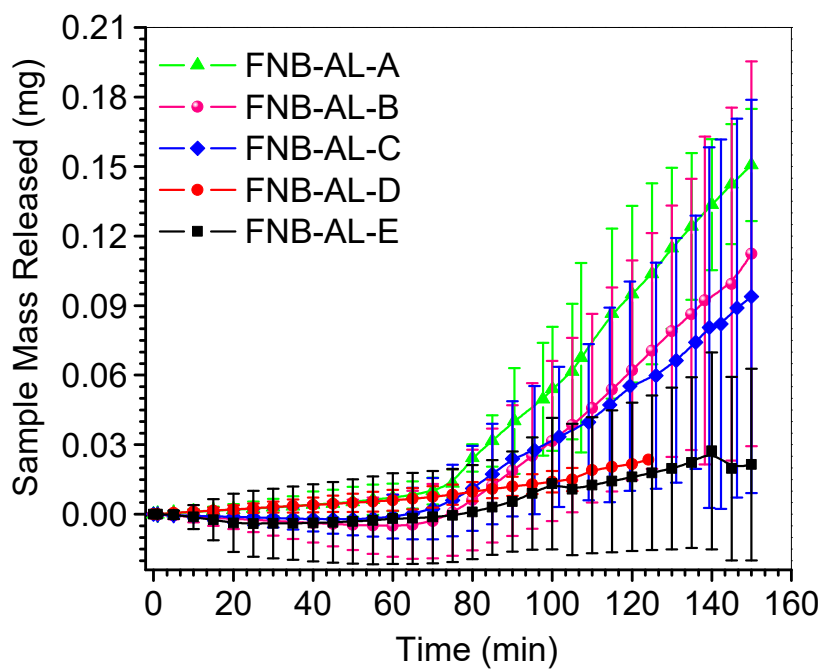

Supplement: s1 [file s1]
